# Supplementary material
Source: publisher figshare collection journal article supplement (https://sage.figshare.com/ndownloader/files/17855390)
Supplement: Supplementary file 1 [file 17855390]

## Supplemental material 1

### Topic guide semi-structured interview : pre-observation phase

#### Introduction

To learn about which elements play a role in the decision to (not) prescribe antibiotics during out-of-hours care we are looking into the possibility to video record consultations. Of course, we would ask informed consent to participating general practitioners as well as patients. Because we use a participatory approach for our study we find it very important to discuss the setup of such type of research with the stakeholders (i.e. the general practitioners)

- Have you ever video-recorded one of your own consultations?
  - How was this for you?
  - How did you organize this?
    - Material, patient consent? Did you watch it by yourself or with others?  
Feedback of someone?
  - What did you learn about this?
- Would you consent video recording your consultations during out-of-hours?
  - Why (not)?
  - Under which conditions?
  - Importance of camera angle?
  - Type of camera?
- What do you feel about the videos being used for research? Why (not)? Conditions?
- Could the transcribed and anonymized videos be used for peer teaching? Why (not)? Conditions?
- Could the videos be used for peer teaching? Why (not)? Conditions?
- Would you consent to audio recording your consultations during out-of-hours? Why (not)? Conditions?
- Would you consent to showing your consultation report (from the electronic health record)? Why (not)? Conditions?
